# Supplementary material for: Combinatorial control of Drosophila circular RNA expression by intronic repeats, hnRNPs, and SR proteins
Source: PubMed Central journal article supplement — Genes Dev. 2015 Oct 15;29(20):2168–82. doi: 10.1101/gad.270421.115 (PMC4617980; doi:10.1101/gad.270421.115), 2015-10-15
Supplement: supp_gad.270421.115_SuppFigs_Table1.pdf [file supp_gad.270421.115_SuppFigs_Table1.pdf]

# Supplemental Figure 1

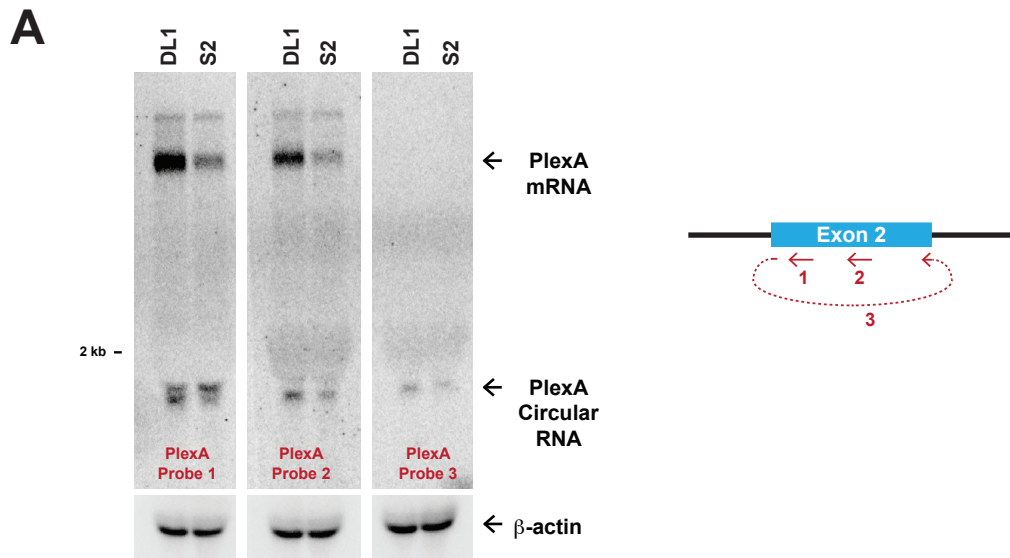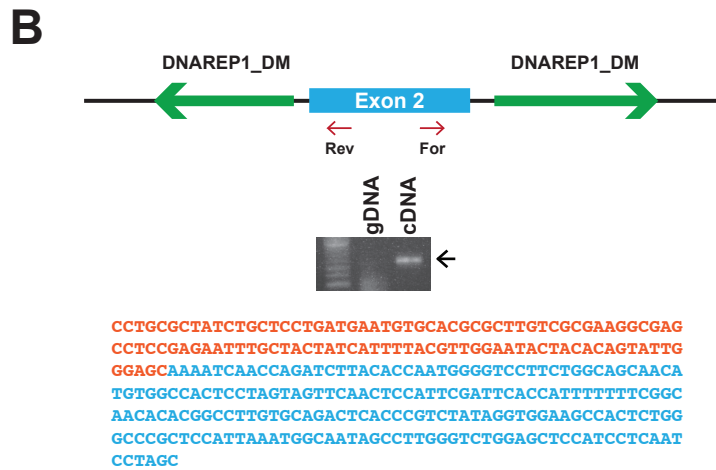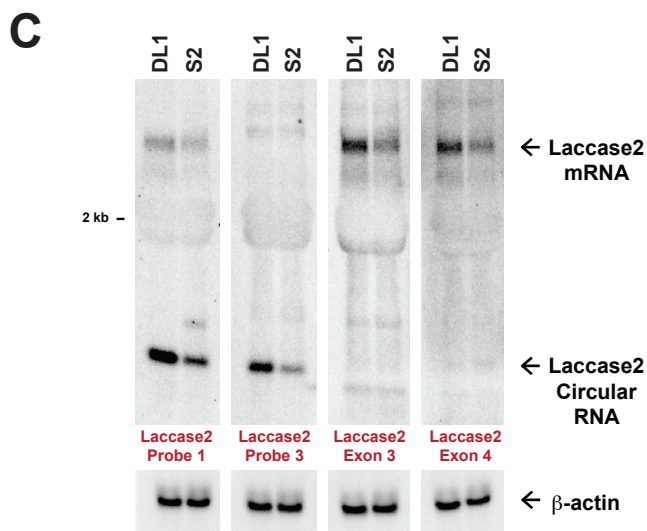



**A**

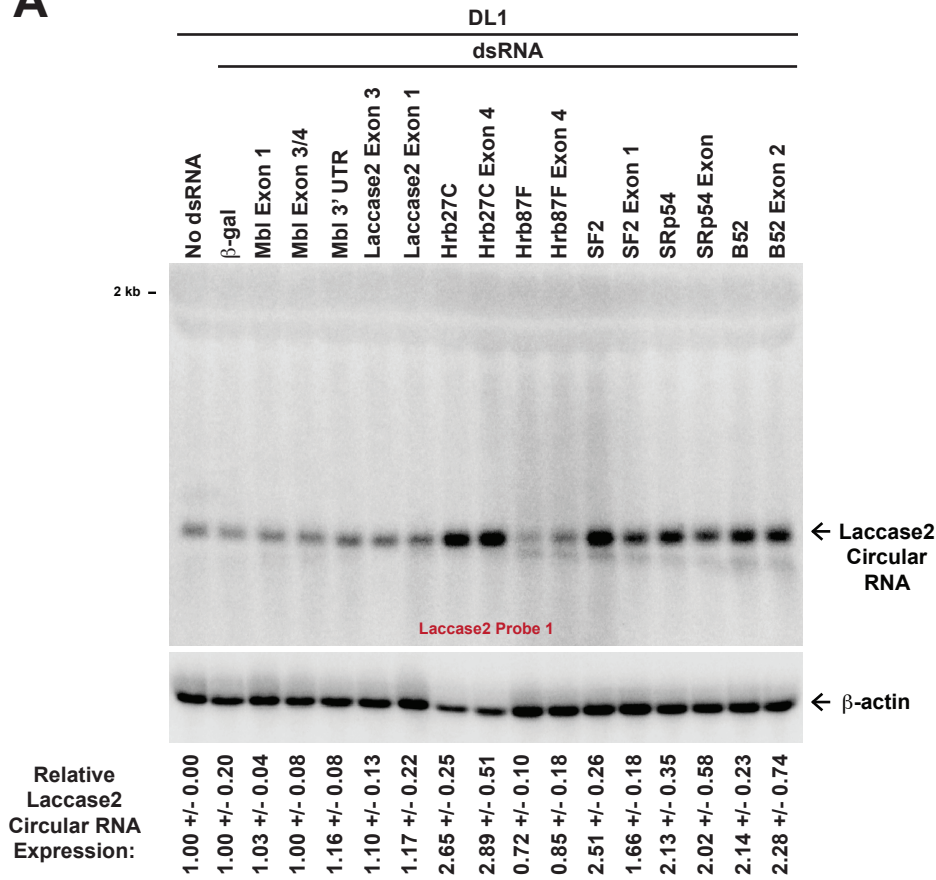

**B**

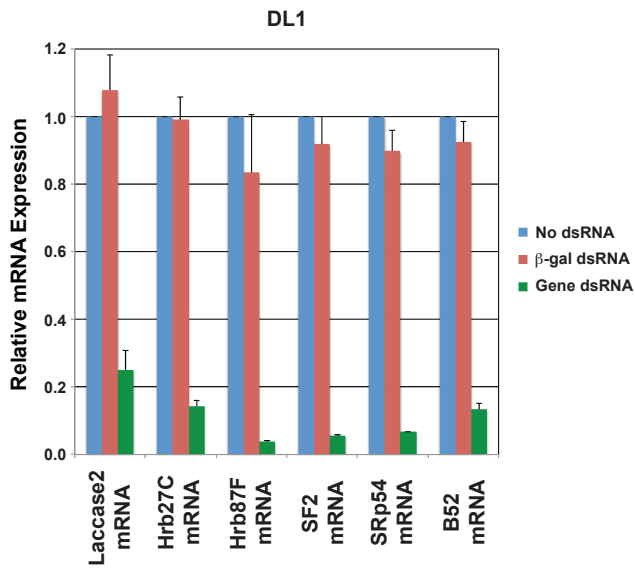

**C**

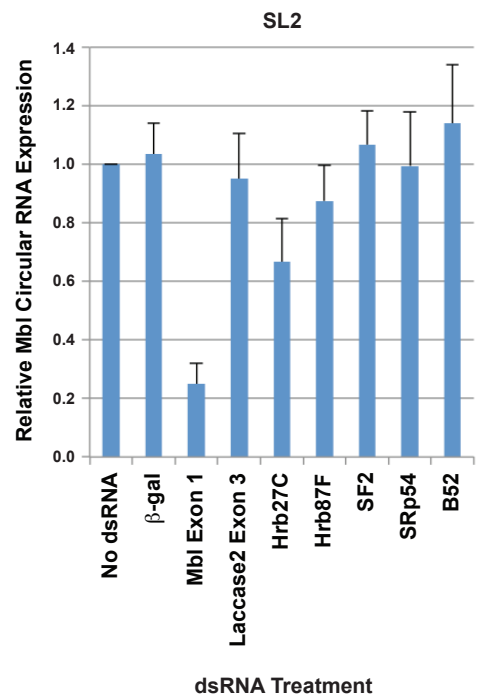

# Supplemental Figure 4

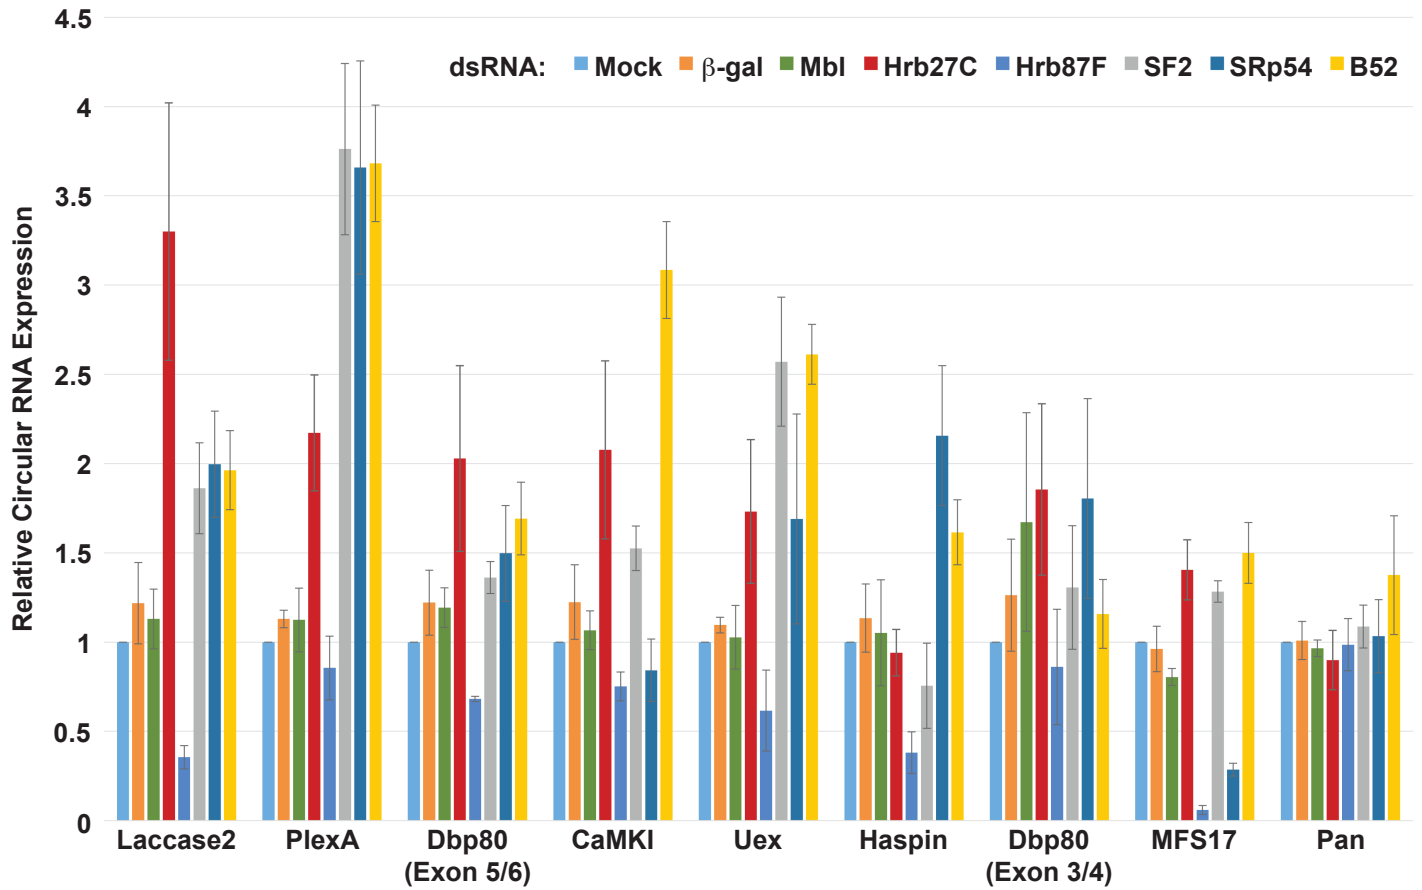

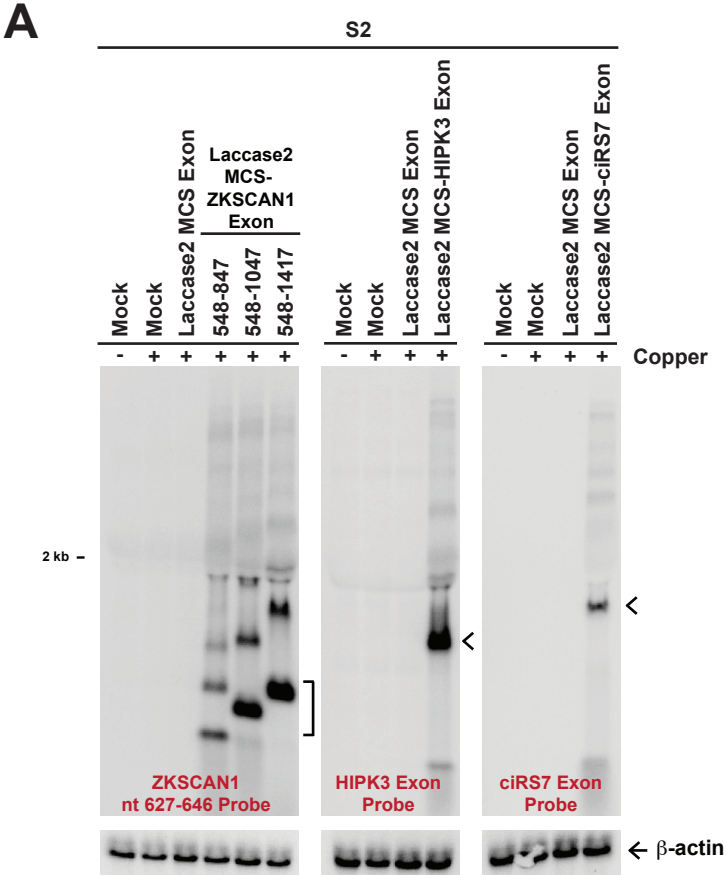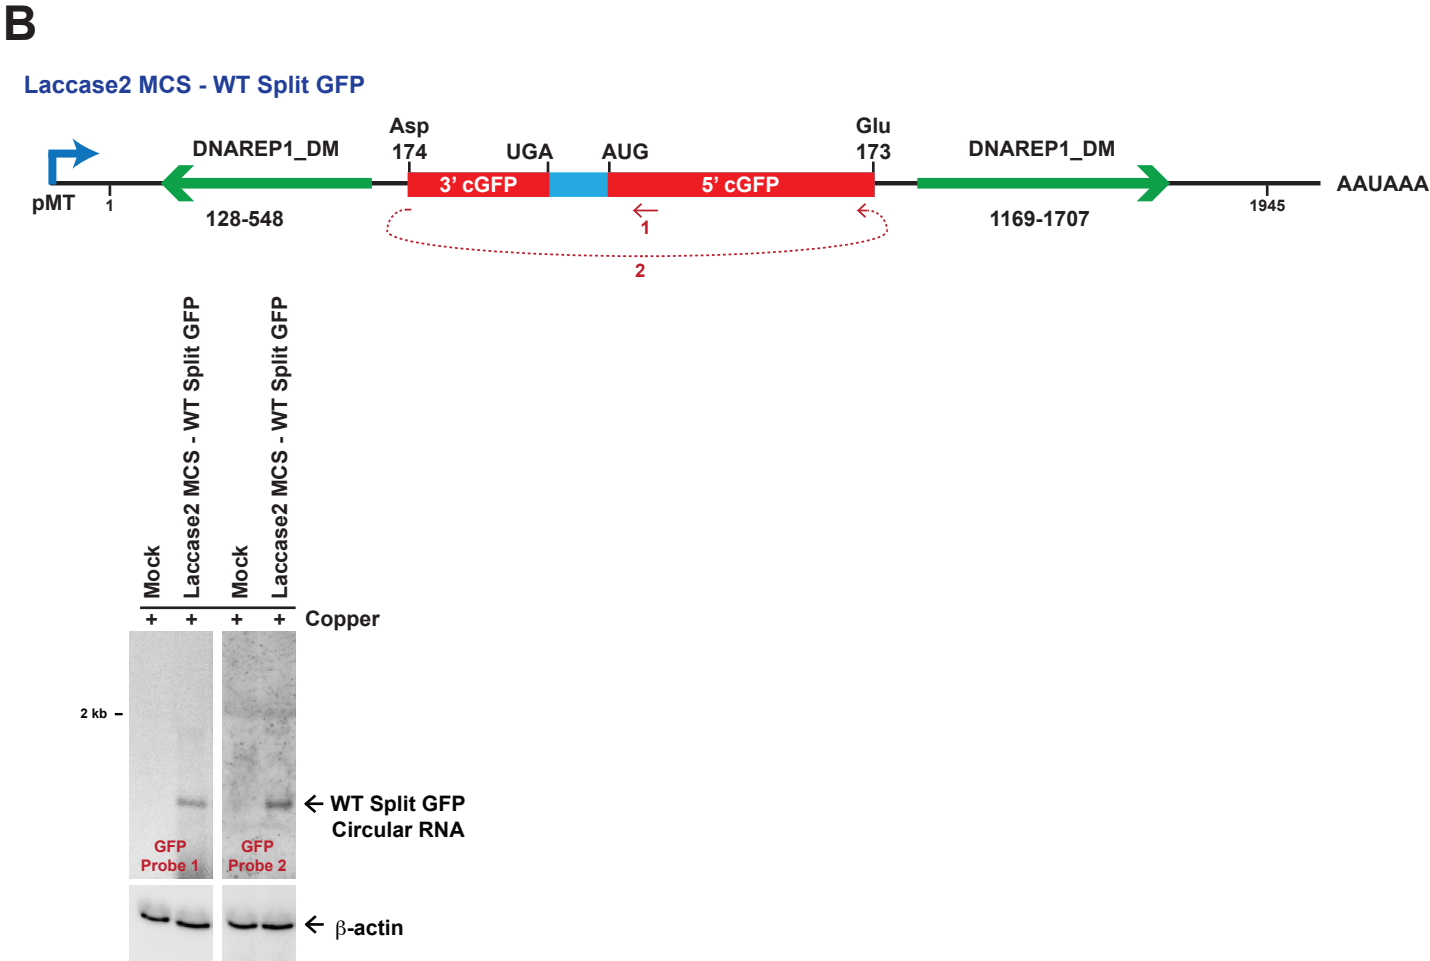



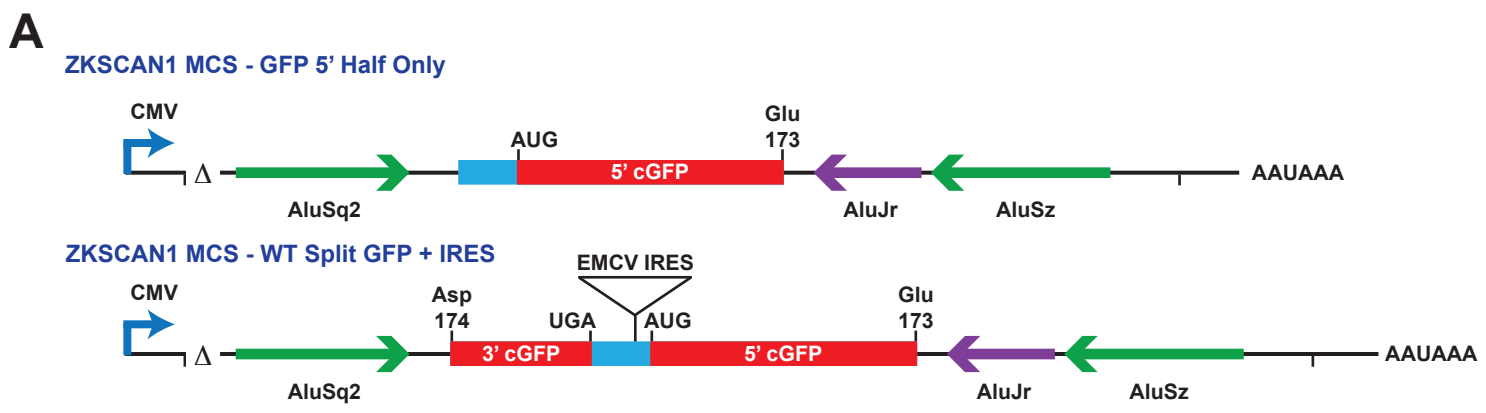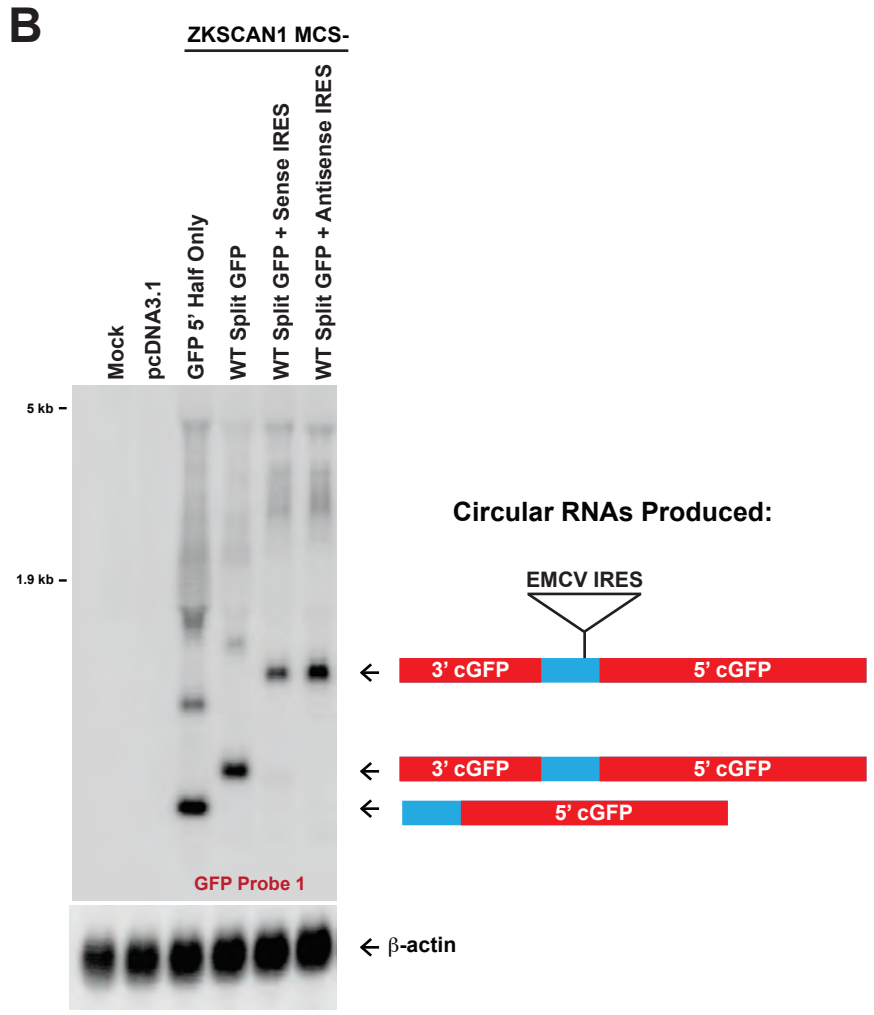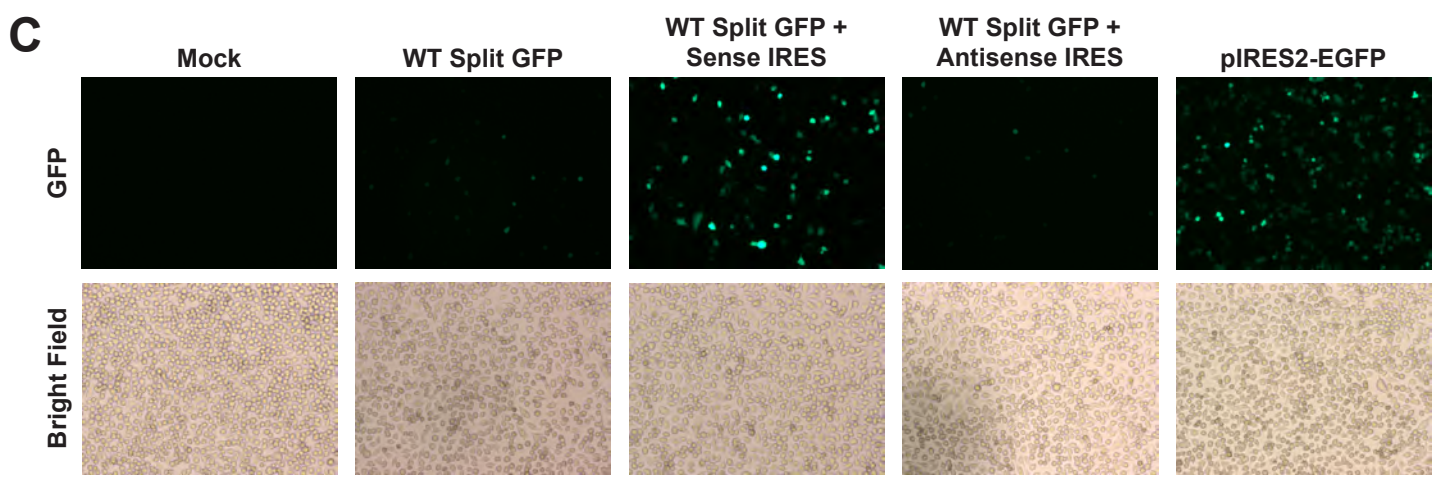

# Supplemental Figure 8

## A

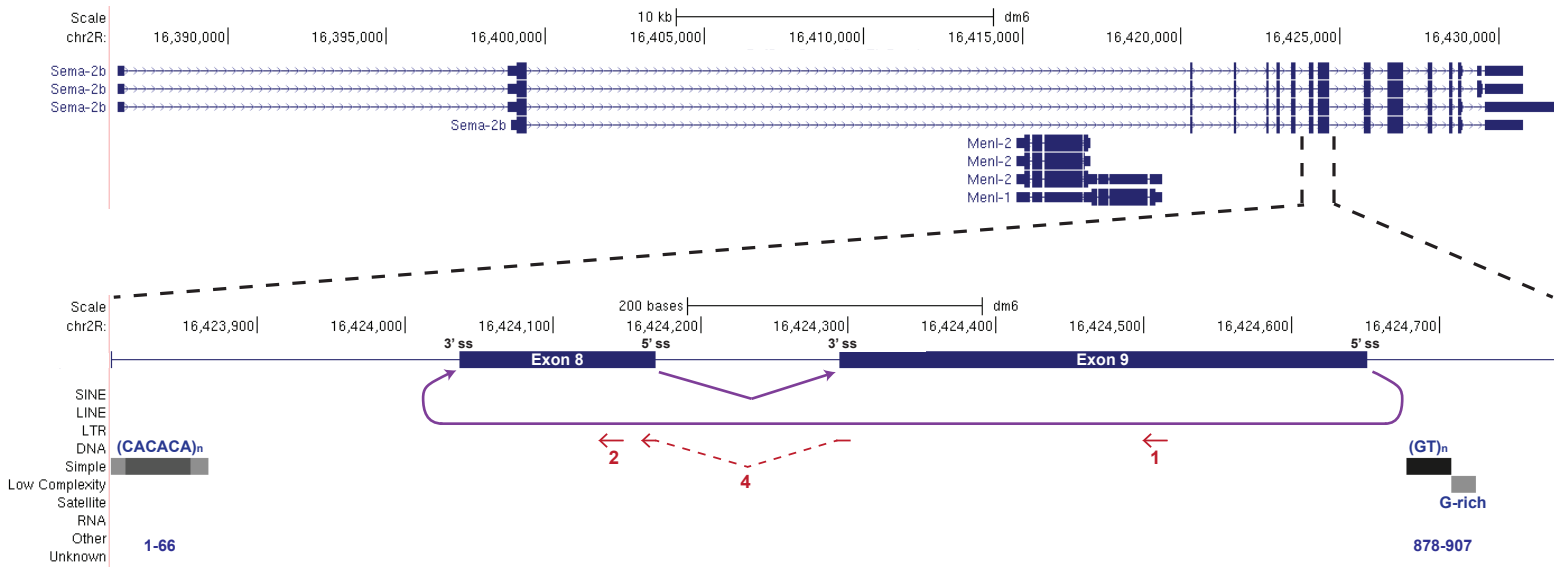

## B

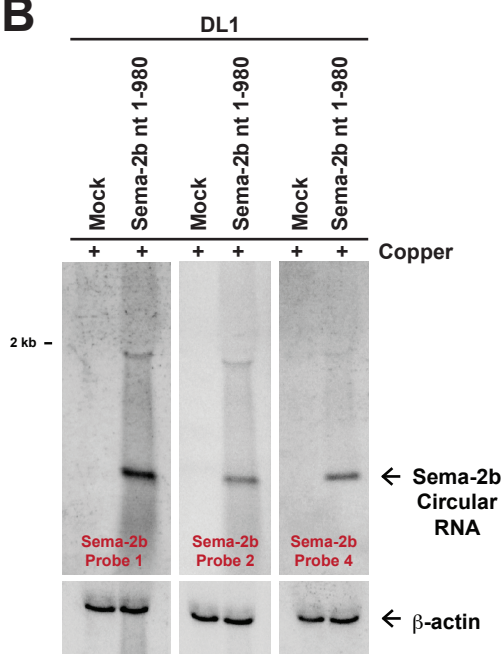

## C

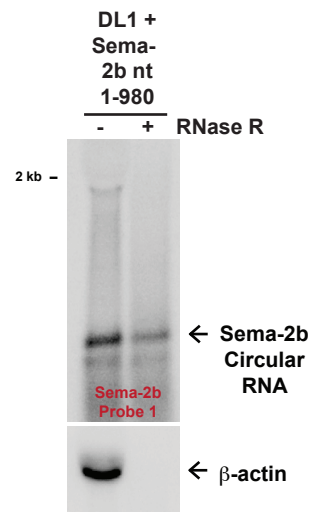

## D

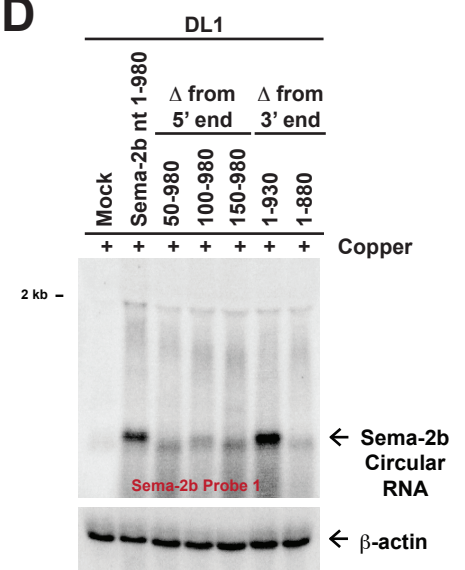



# Supplemental Figure 9

Endogenous:

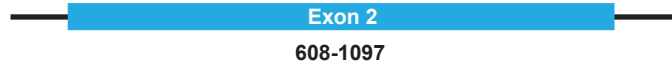

Plasmid-derived:

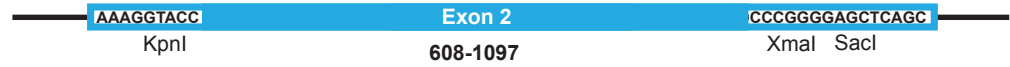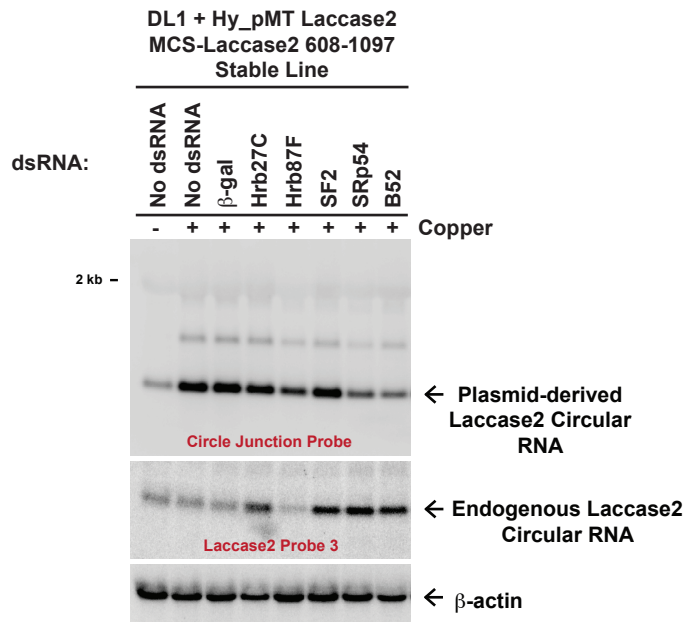

**Supplemental Table 1**

**Figures where plasmid is used**

| Northern Probe                | Sequence                     | Main Figures                                                           | Supplemental Figures                  | Notes                                                                       |
|-------------------------------|------------------------------|------------------------------------------------------------------------|---------------------------------------|-----------------------------------------------------------------------------|
| Laccase2 Probe 1              | GCTAGGATTGAGGATGGAGCTCC      | 1A, 1C, 1D, 1G, 2B, 2C, 2E, 3A, 3B, 3D, 4A, 5B, 5C                     | 1C, 3A, 6A                            | Complementary to nt 790-812 of full-length Laccase2 Sense insert            |
| Laccase2 Probe 3              | TGGTTGATTGTCGCCAATAC         | 1B                                                                     | 1C, 2C, 9                             | Complementary to nt 608-618, 1087-1097 of full-length Laccase2 Sense insert |
| Laccase2 Probe 4              | CCAGAAGGACCCATTGGTGT         | 1B                                                                     |                                       | Complementary to nt 625-645 of full-length Laccase2 Sense insert            |
| Laccase2 Probe 8              | AGCTCGGCAGTTGCACTAGTAG       |                                                                        | 2B                                    | Complementary to nt 959-980 of full-length Laccase2 Sense insert            |
| Laccase2 Exon 3               | CCATTCCCTCCATATGTTCTCCAC     |                                                                        | 1C                                    |                                                                             |
| Laccase2 Exon 4               | GCAGGATAGCCAGTTGTTGAGC       |                                                                        | 1C                                    |                                                                             |
| Mbl Probe 1                   | GCTGGAGTTGTATAGTTATAGCCTAGC  | 1A, 3A, 3D                                                             |                                       |                                                                             |
| EGFP Probe                    | CTTGACAGCTCGTCCATGC          | 2E, 5B                                                                 |                                       |                                                                             |
| β-actin ( <i>Drosophila</i> ) | AGCACAGTGTGGCGTACAG          | 1A, 1B, 1C, 1G, 2B, 2C, 2E, 3A, 3B, 3D, 4A, 4B, 5B, 6B, 6C, 6D, 6E, 6F | 1A, 1C, 2C, 3A, 5A, 5B, 8B, 8C, 8D, 9 |                                                                             |
| β-actin (Human)               | AGCACTGTGTTGGCGTACAG         | 5C, 5E, 7C, 7D                                                         | 6A, 6B, 6C, 6F, 7B                    |                                                                             |
| 18S rRNA                      | ACGCGCCTGCTGCCTTCCTT         | 1D, 3B                                                                 | 2B                                    |                                                                             |
| ZKSCAN1 nt 626-647            | AGCAGTCATCATTAGGCTCCA        | 5E, 6D, 7C                                                             | 5A, 6C, 6D, 6E, 6F                    |                                                                             |
| Circle Junction Probe         | GGTACCTTT GCTGAGCTCC         | 6B, 6C, 6D, 6E, 6F                                                     | 9                                     | Complementary to nt 608-616, 655-664 of Hy_pMT Laccase2 MCS Exon insert     |
| HIPK3 Exon Probe              | GTAATACTGATGTCACCTTCTCC      | 6E                                                                     | 5A, 6B                                |                                                                             |
| ciRS7 Exon Probe              | TGGAAGATCTGATTTGATGGAAGACCTT | 6F, 7D                                                                 | 5A                                    |                                                                             |
| MALAT1                        | GCTTATCCCAATGGAGGT           |                                                                        | 6D, 6E                                |                                                                             |
| GFP Probe 1                   | CTCACGCTGAACCTGTGGCCAT       |                                                                        | 5B, 7B                                |                                                                             |
| GFP Probe 2                   | GCTGCCATCCTCGATGTTG          |                                                                        | 5B                                    |                                                                             |
| PlexA Probe 1                 | CTGTCTCGATGGCAGCCAG          |                                                                        | 1A                                    |                                                                             |
| PlexA Probe 2                 | GGTCCCGGCGCAATAATGC          | 4B                                                                     | 1A                                    |                                                                             |
| PlexA Probe 3                 | ATCATGTAAACcgTTAGAACAACA     |                                                                        | 1A                                    |                                                                             |
| Sema-2b Probe 1               | TGGCATCTTGACAGCGATTGATCTC    |                                                                        | 8B, 8C, 8D                            | Complementary to nt 718-744 of Sema-2b nt 1-980 insert                      |
| Sema-2b Probe 2               | AGCTTGGAGTCGACTTACCGG        |                                                                        | 8B                                    | Complementary to nt 340-361 of Sema-2b nt 1-980 insert                      |
| Sema-2b Probe 4               | AAGTTGGGCTgtgccagca          |                                                                        | 8B                                    | Complementary to nt 361-369, 494-503 of Sema-2b nt 1-980 insert             |

| dsRNA Target    | Forward Primer                                | Reverse Primer                                |
|-----------------|-----------------------------------------------|-----------------------------------------------|
| β-gal           | TAATACGACTCACTATAGGG CTGGCGTAATAGCGAAGAGG     | TAATACGACTCACTATAGGG CATTAAGCGAGTGGCAACA      |
| Mbl Exon 1      | TAATACGACTCACTATAGGG AGAGTGTTCGCTGTGTTCCG     | TAATACGACTCACTATAGGG GCGGCTGCTTTTATTTCTTGT    |
| Laccase2 Exon 3 | TAATACGACTCACTATAGGG GTTACTCAGTGCCCAATTCA     | TAATACGACTCACTATAGGG CATCAACAGGATGCACAGGC     |
| Hrb27C          | TAATACGACTCACTATAGG CTTGCGGGACATCATTGACT      | TAATACGACTCACTATAGG GCGGGACTTCTTCTCTCT        |
| Hrb87F          | TAATACGACTCACTATAGG GATGAAAGATCCCAAGACGA      | TAATACGACTCACTATAGG TGCTTGGCAATAGCCTTCTT      |
| SF2             | TAATACGACTCACTATAGG CGACGATGCGGTGAAG          | TAATACGACTCACTATAGG CGATCGGAAGCGAGAGT         |
| SRp54           | TAATACGACTCACTATAGG CGAGTGGCGGCTAGAC          | TAATACGACTCACTATAGG CGCTTGCTGCGGAGAAC         |
| B52             | TAATACGACTCACTATAGG GACCGCAATAACGAGAGCAT      | TAATACGACTCACTATAGG CCGGTGTACAAGTCGCAGTA      |
| Mbl Exon 3/4    | TAATACGACTCACTATAGGG CTGTAATCGTGATAAACCGCCGT  | TAATACGACTCACTATAGGG CGGAACGTGGTATTTCTGCTG    |
| Mbl 3' UTR      | TAATACGACTCACTATAGGG GCGATGCCATGGTCCATAATCC   | TAATACGACTCACTATAGGG TGTTTCTCTCCGTTCCGCTTGT   |
| Laccase2 Exon 1 | TAATACGACTCACTATAGGG CGTTGCTCGTACTTCATTAAGCCG | TAATACGACTCACTATAGGG TGATTTGCTGTGAGTTGGCAACA  |
| Hrb27C Exon 4   | TAATACGACTCACTATAGGG CTGACATGACTCGCGTGCTC     | TAATACGACTCACTATAGGG TCTCTCCACACGATCCTTCTC    |
| Hrb87F Exon 4   | TAATACGACTCACTATAGGG TGTCAGACCAGGCAGACAAGA    | TAATACGACTCACTATAGGG ACTAAGCGTTCCGGGTTCTTAGG  |
| SF2 Exon 1      | TAATACGACTCACTATAGGG CCATTGTTCATTGTGAGCGTGAC  | TAATACGACTCACTATAGGG GCGCATCTCGAACTCAACAAAAGC |
| SRp54 Exon      | TAATACGACTCACTATAGGG TCTCCCGATCTAGAAGCAAGC    | TAATACGACTCACTATAGGG TAGGTCTAGGGCGAGTTGGAG    |
| B52 Exon 2      | TAATACGACTCACTATAGGG TTCTAAAGGACAGTCGAGCA     | TAATACGACTCACTATAGGG GCCGTAGCCATTTTGTGAGG     |

| qPCR Primers                  | Forward Primer           | Reverse Primer           |
|-------------------------------|--------------------------|--------------------------|
| Laccase2 Circular RNA         | GCCTCCGAGAATTTGCTACTATCA | ACATGTTGCTGCCAGAAGGAC    |
| PlexA Circular RNA            | ATTTCTTTGCGTTGGTGTCAAT   | CCCAGCATGCCATGTGTTCTA    |
| Dbp80 (Exon 5/6) Circular RNA | AGCCACCCAAAGGTCATCATG    | AATGTCCCATTCCGCGCAGC     |
| CamKI Circular RNA            | GGGTCTACACAGAAAAGGACG    | CATTTGCCATCGAAATGATTTGCA |
| Uex Circular RNA              | ATTCGCAATGGTTCCGCCGTG    | GCAACGGATTTTCAGCACTTACT  |
| Haspin Circular RNA           | CGATGTCTATCGAATGATGCCGA  | CCGGATGGTCATTTTCAGATCCC  |
| Dbp80 (Exon 3/4) Circular RNA | GCCATGCTTAGCCGAGTCAAC    | GCTTTGTGTTCCACAGCCCC     |
| MFS17 Circular RNA            | CACCAAGCGCGTGGAAATTT     | CAAATATGGTCATTCCGCAGCT   |
| Pan Circular RNA              | AAACAAGAAATGCGGTGTTTCAGG | CTCGAAAAACTTCTTTGCACTGCA |
| Laccase2 mRNA                 | GGACTTGTGTGAGTGTGGTATTCG | ACATCGTATGTTGGCGGAGAGA   |
| Mbl mRNA                      | CATTCGGCCCACTCGTACA      | TGTGCCACCTGCACCTGTTTG    |
| Hrb27C mRNA                   | GGCTTCGGCTTCTCTCCTT      | TTCTTGATTTTCGACCTGCTTGC  |
| Hrb87F mRNA                   | CCGTCCAGCTCTACAGTC       | CCACCTCCGGTGTGTAGTT      |
| SF2 mRNA                      | ATCCAGGACCTGTTCCACAA     | CGCATCTCGAACTCAACAA      |
| SRp54 mRNA                    | GTGTGATCCAGGTGACCAAC     | GTACAGGCGGATCCTCTAA      |
| B52 mRNA                      | CACACGCGACATCCTCATC      | GTTCCGCAAGCAGCTCTTTG     |
| Act42a (β-actin) mRNA         | CTCCGTCACCATGAAGATT      | TTCGAGATCCACATCTGCTG     |
